# Supplementary material
Source: Copernicus journal article supplement (doi:10.5194/acp-26-7503-2026)
Supplement: Supplementary file 1 [file acp-26-7503-2026-supplement.pdf]

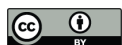

*Supplement of*

## **Evaluation of ozone trends in the mesosphere/lower thermosphere using a new merged dataset of ozone profiles**

**Monika E. Szlag et al.**

*Correspondence to:* Monika E. Szlag ([monika.szlag@fmi.fi](mailto:monika.szlag@fmi.fi))

The copyright of individual parts of the supplement might differ from the article licence.

# 1 Section S1. Coverage of selected datasets

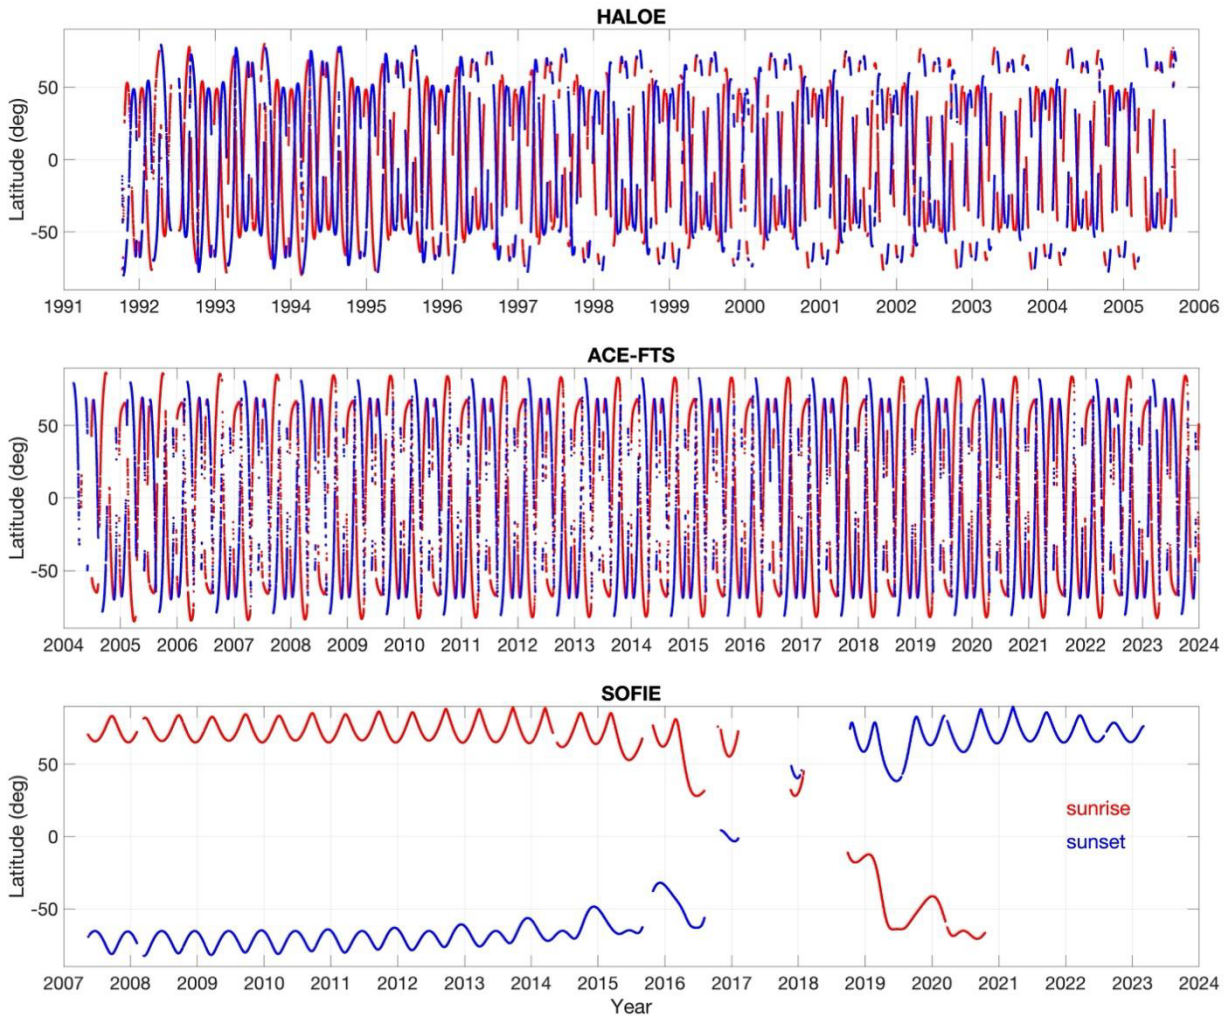

2

3 **Figure S1: Latitude coverage by solar occultation measurements.**

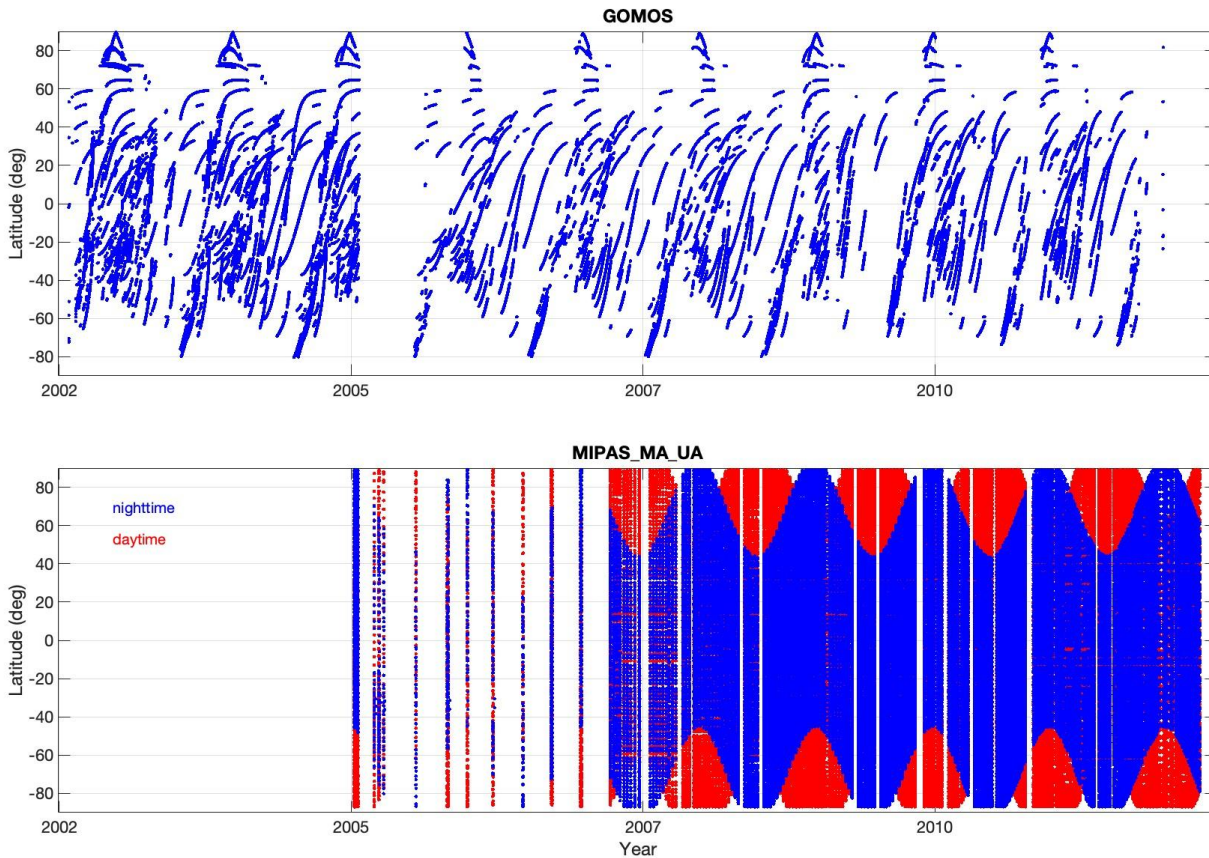

4  
5 **Figure S2: Latitude coverage by GOMOS and MIPAS\_MA\_UA mode.**

## 6 **Section S2. Conversion of GOMOS ozone profiles to pressure grid**

7 GOMOS provides ozone number density profiles on an altitude grid. Since the temperature and pressure profiles in  
 8 the GOMOS files are based on a combination of ECMWF analyses and the MSIS90 model and are therefore not very  
 9 accurate, we applied the following approach. First, we computed ozone monthly zonal means on the GOMOS altitude  
 10 grid. Then, we used the altitude-pressure relationship derived from MIPAS\_MA\_UA measurements to represent GOMOS  
 11 profiles on a pressure grid. After 2007, when MIPAS\_MA\_UA provided dense coverage, altitude-pressure conversion  
 12 profiles were used for each month and latitude zone. Before 2007, when MIPAS\_MA\_UA coverage was rather sparse,  
 13 we used a climatology of altitude-pressure conversion derived from MIPAS data (i.e., conversion factors as a function of  
 14 calendar month, latitude, and altitude). Figure S3 shows the differences in the altitude-pressure relationship when the  
 15 original GOMOS pressure profiles are used (Figure S3, top) and after conversion using MIPAS\_MA\_UA data (Figure  
 16 S3, bottom). When the original pressure data from the GOMOS files are used, the altitude differences can reach up to 1  
 17 km in the mesosphere and lower thermosphere. After conversion using MIPAS\_MA\_UA data, the altitude difference is  
 18 exactly zero after 2007 by construction and does not exceed 0.5 km before 2007.

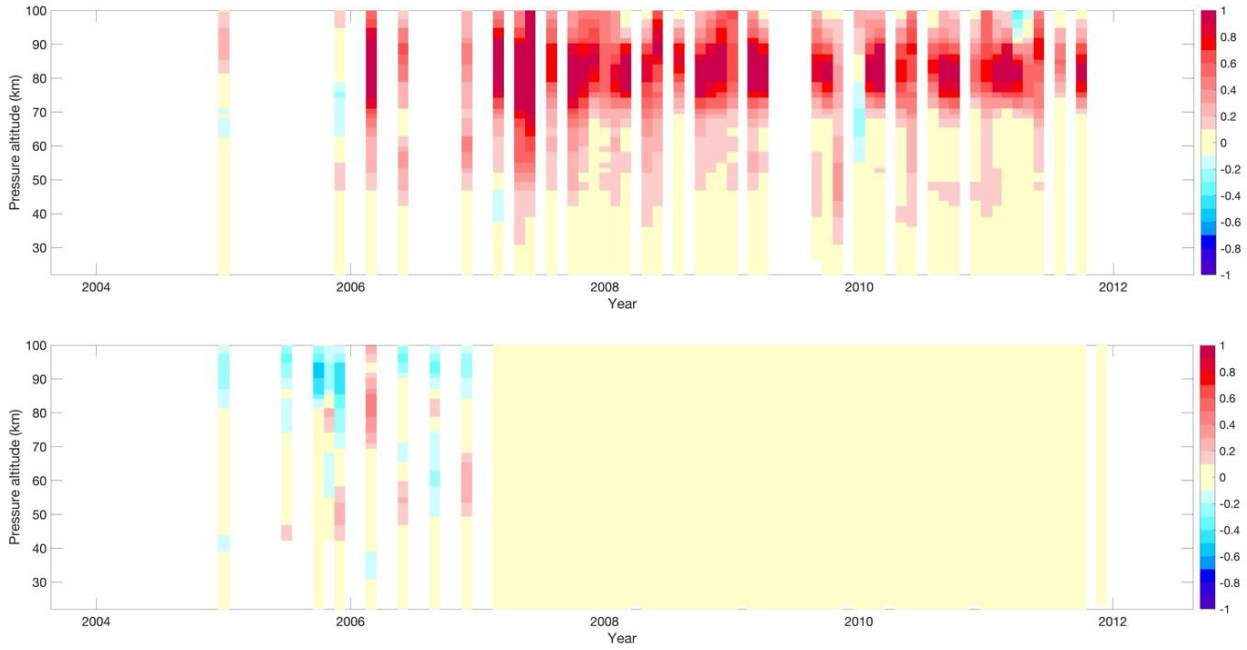

19

20 **Figure S3:** The time series of differences between GOMOS and MIPAS altitude (km) as a function of pressure altitude  
 21 (pressure altitude  $z = 16 \log_{10}(1013/P)$ , where P is pressure in hPa) when the original GOMOS pressure-altitude relation is  
 22 used (top) and when the MIPAS altitude-pressure relation is used (bottom).

23 **Section S3. Example time series of ozone**

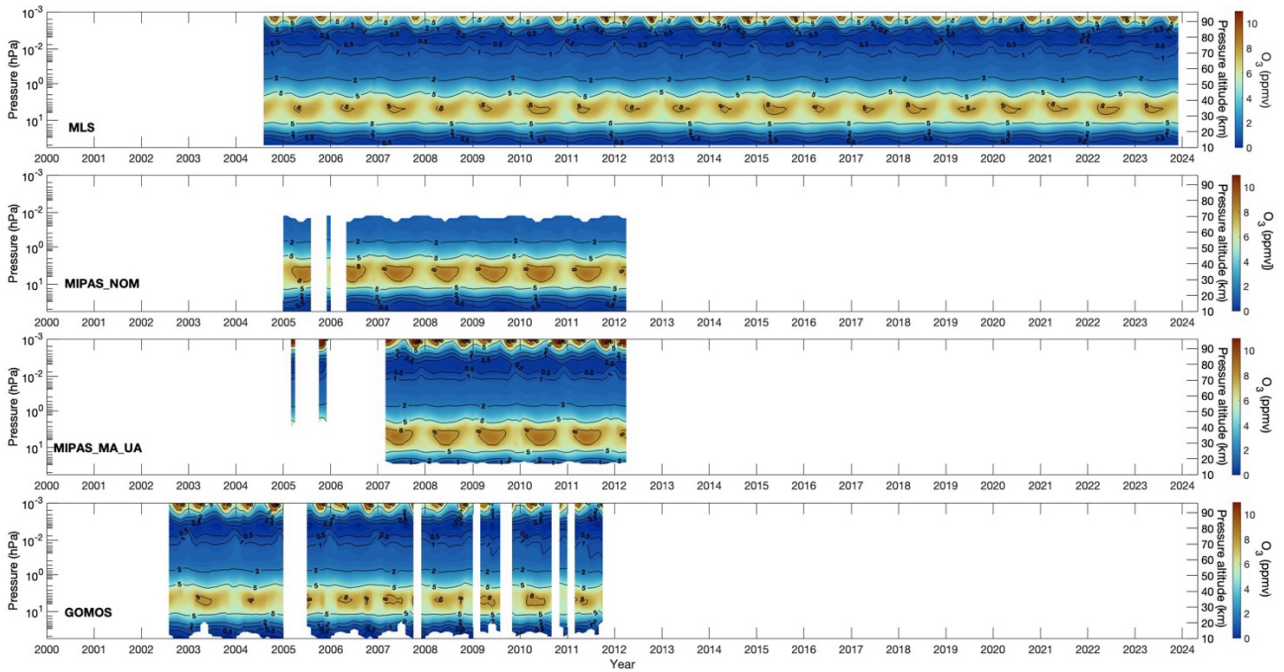

24

25 **Figure S4:** Time series of nighttime ozone at mid-latitudes (30°N–60°N) from MLS, MIPAS\_NOM, MIPAS\_MA\_UA, and  
 26 GOMOS (from top to bottom).

27 **Section S4. Example of deseasonalised anomalies for MIPAS**

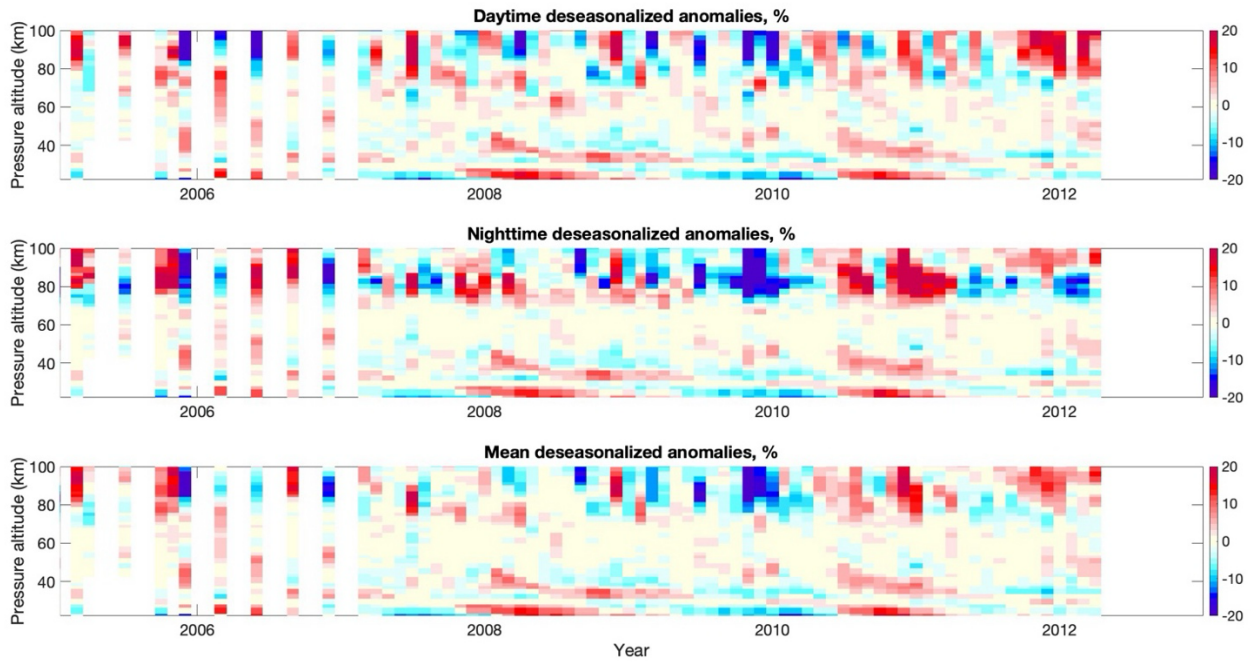

28

29 **Figure S5: MIPAS\_MA\_UA deseasonalized anomalies at 0-10°N. Top: daytime anomalies, center: nighttime anomalies,**  
30 **bottom: the weighted mean of daytime and nighttime anomalies.**

31 **Section S5. Ozone trends from LOTUS model**

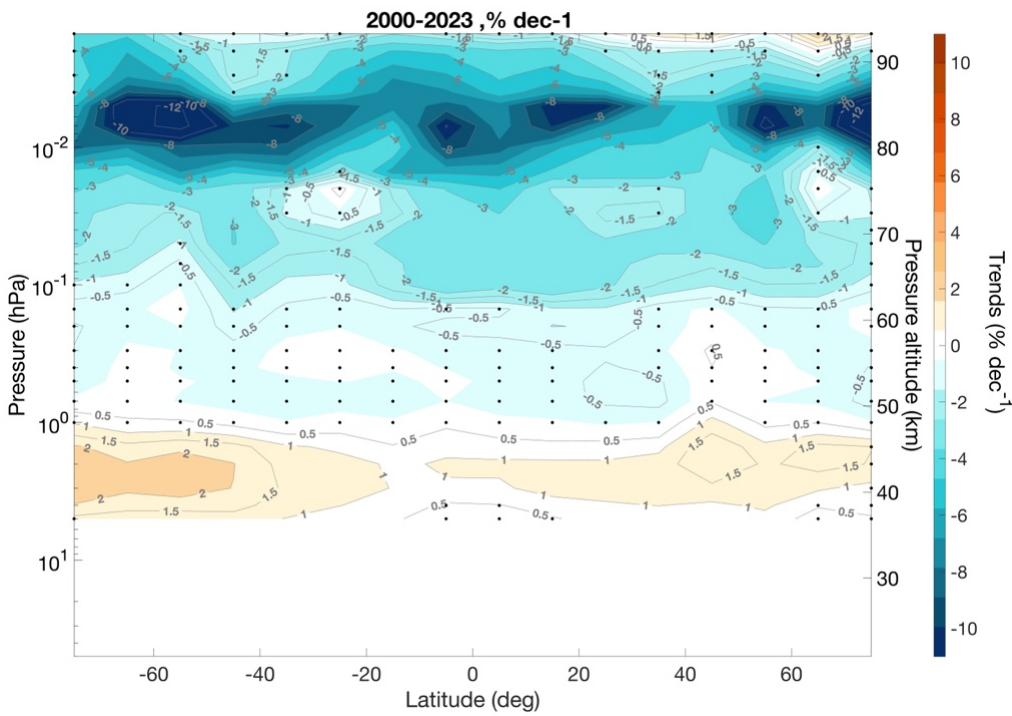

32

33 **Figure S6: Latitude-altitude variation of ozone trends derived from the METEOR-O<sub>3</sub> dataset using LOTUS model. Trends are**  
34 **calculated over 2000-2023. The black dots denote trends that are not statistically significant at the 95% confidence level. Trends**  
35 **are given in % per decade.**
